# Supplementary material for: Thermostability of protein nanocages: the effect of natural extra peptide on the exterior surface
Source: PubMed Central journal article supplement — RSC Adv. 2019 Aug 9;9(43):24777–82. doi: 10.1039/c9ra04785a (PMC9069879; doi:10.1039/c9ra04785a), 2019-08-09
Supplement: RA-009-C9RA04785A-s001.pdf [file RA-009-C9RA04785A-s001.pdf]

Electronic Supplementary Information (ESI)

**Thermostability of protein nanocage: the effect of natural extra peptide on the exterior surface**

Xiaorong Zhang,<sup>a</sup> Jiachen Zang,<sup>a</sup> Hai Chen,<sup>a</sup> Kai Zhou,<sup>a</sup> Tuo Zhang,<sup>a</sup> Chenyan Lv,<sup>\*a</sup>

Guanghua Zhao<sup>a</sup>

<sup>a</sup>Beijing Advanced Innovation Center for Food Nutrition and Human Health, College of Food Science & Nutritional Engineering, China Agricultural University, Key Laboratory of Functional Dairy, Ministry of Education, Beijing 100083 China.

\*Corresponding author

E-mail: 2019023@cau.edu.cn

## Supporting Figures

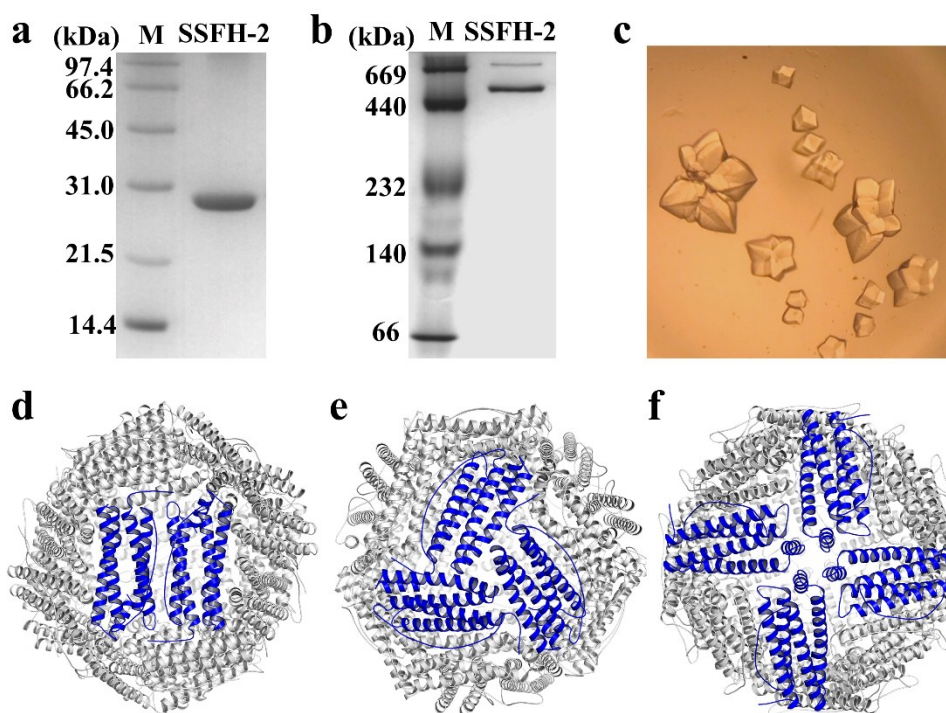

**Figure S1.** Preparation and characterization of SSFH-2. (a) SDS-PAGE and (b) Native PAGE analyses of SSFH-2. (c) Light micrograph of the snow-flake crystals of SSFH-2. (d-f) View of SSFH-2 crystal structure down the two-fold (d), three-fold (e) and four-fold (f) symmetry axes. The protein nanocage is a homopolymer which comprises 24 subunits (PDB ID: 6J4J).

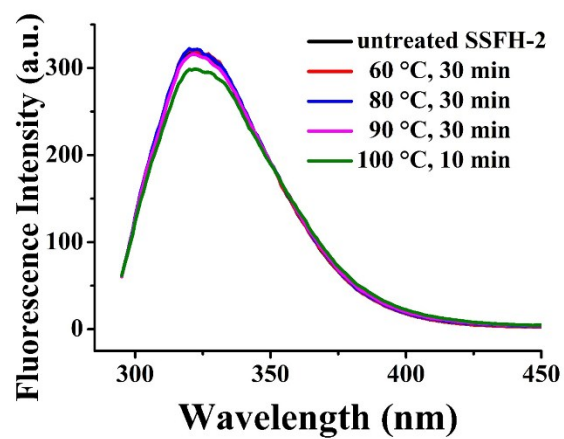

**Figure S2.** Fluorescence spectra of SSFH-2 upon thermal treatment in the temperature range of 60-100 °C for different times. The curves represent an average of three experimental measurements. Conditions: 1.0  $\mu$ M SSFH-2 in 50 mM MOPS, pH 7.9.

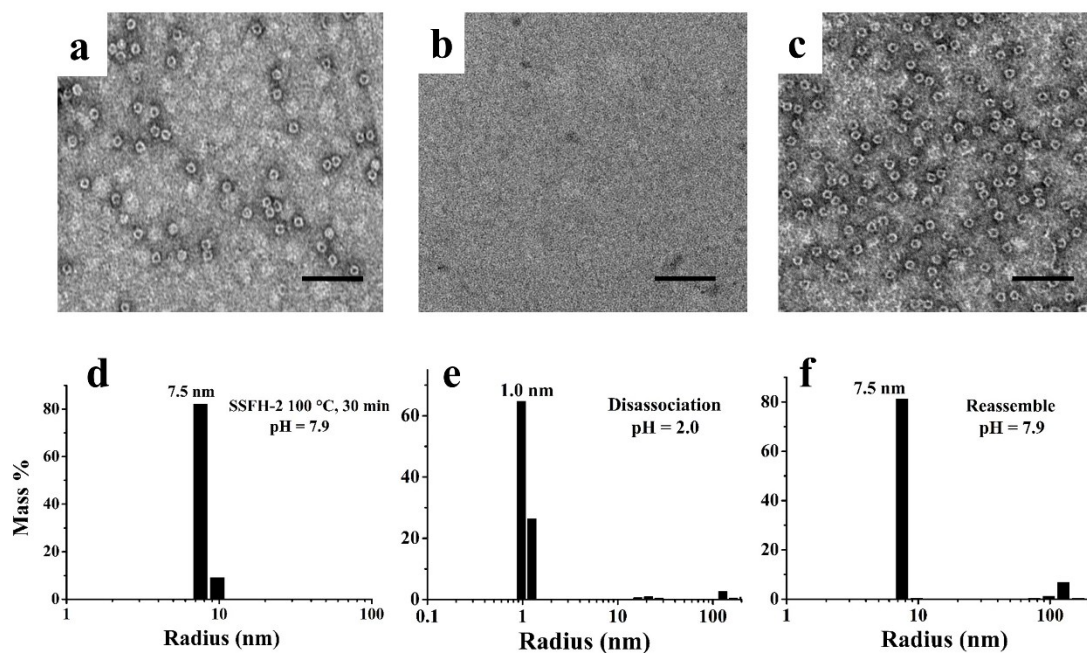

**Figure S3.** Disassembly and reassembly property of heat-treated SSFH-2 protein nanocage controlled by pH. (a) TEM images of SSFH-2 after 100 °C treated for 30 min at pH 7.9. Protein shell-like structure kept well. (b) At pH 2.0, thermal-treated SSFH-2 protein nanocage disassembled into subunits, so such shell-like structure disappeared. (c) After adjusting pH back to 7.9, dissociated subunits reassembled into shell-like structure. Scale bars represent 100 nm. (d-f) The above TEM results were confirmed by dynamic light scattering (DLS). (d) Dynamic light scattering (DLS) analysis of SSFH-2 after 100 °C treated for 30 min at pH 7.9. There is one population with the hydrodynamic radius ( $R_H$ ) of 7.5 nm in solution. (e) At pH 2.0, the  $R_H$  of heat-treated SSFH-2 in solution decreased to 1.0 nm due to protein nanocage disassembly into subunits. (f) When adjusting pH back to 7.9, the  $R_H$  of protein species in solution increased back to 7.5 nm due to subunit reassembly into protein nanocage.

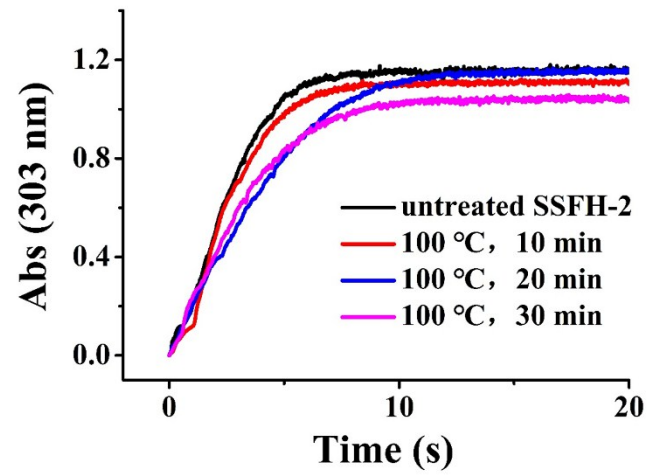

**Figure S4.** Kinetic curves of Fe<sup>2+</sup> oxidation by O<sub>2</sub> in the presence of native and thermal-treated SSFH-2 under different experimental conditions at 500 iron/protein shell. Conditions: 1.0 μM SSFH-2 in 50 mM MOPS, pH 7.9, 25 °C.

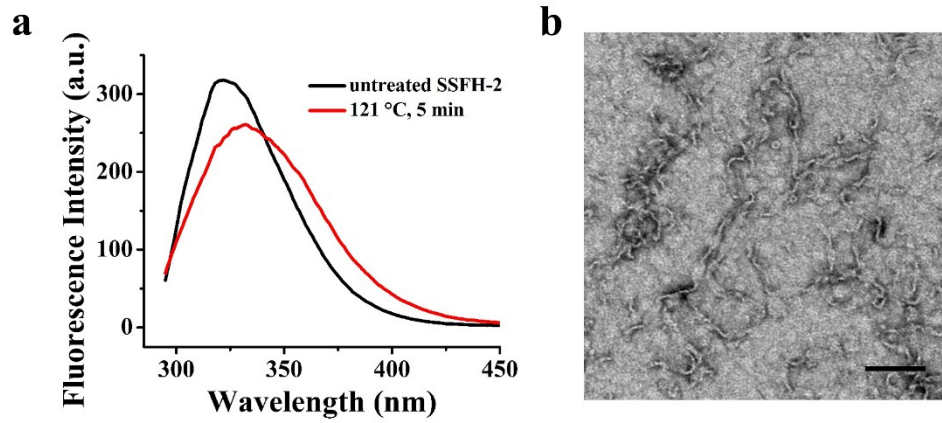

**Figure S5.** (a) Fluorescence spectra comparison between untreated and thermal treated SSFH-2 samples. The curves represent an average of three experimental measurements. Conditions: 1.0  $\mu\text{M}$  SSFH-2 in 50 mM MOPS, pH 7.9. (b) TEM image of thermal treated SSFH-2 at 121  $^{\circ}\text{C}$  for 5 min. Protein shell-like structure disappeared. Scale bar represents 100 nm.

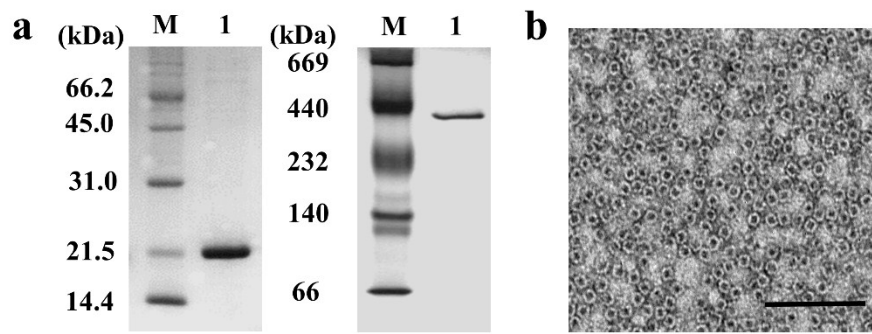

**Figure S6.** Characterization of SSFH-2 and EP-deleted mutant SSFH-2- $\Delta$ EP. (a) SDS (left) and Native (right) PAGE analyses of SSFH-2- $\Delta$ EP. Lane 1, SSFH-2- $\Delta$ EP; lane M, protein markers and their corresponding molecular masses. (b) TEM image of SSFH-2- $\Delta$ EP. Scale bar represents 100 nm.

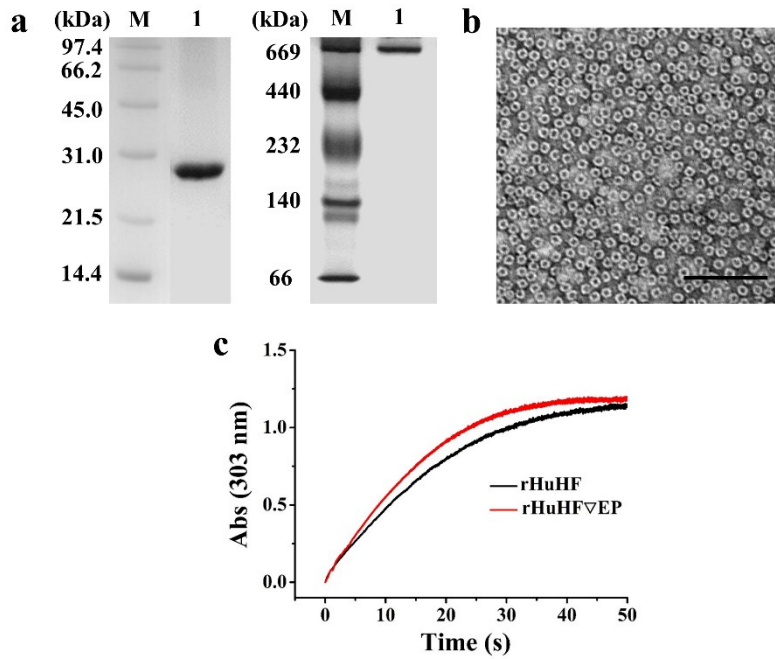

**Figure S7.** Characterization of HuHF and EP-added mutant HuHF- $\nabla$ EP. (a) SDS (left) and native (right) PAGE analyses of HuHF- $\nabla$ EP. Lane 1, HuHF- $\nabla$ EP; lane M, protein markers and their corresponding molecular masses. (b) TEM image of HuHF- $\nabla$ EP. Scale bar represents 100 nm. (c) Kinetic curves of Fe<sup>2+</sup> oxidation by O<sub>2</sub> in the presence of HuHF and EP-added mutant (HuHF- $\nabla$ EP) at 500 iron/protein shell. Conditions: 0.5  $\mu$ M HuHF or HuHF- $\nabla$ EP in 50 mM MOPS, pH 7.9, 25 °C.



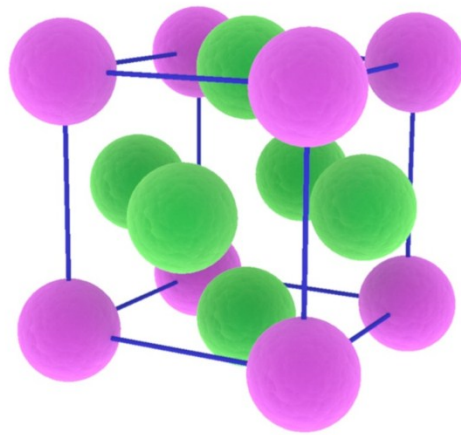

**Figure S8.** The face-centered-cubic (FCC) packing arrangement model of native HuHF crystals (PDB ID, 2FHA).

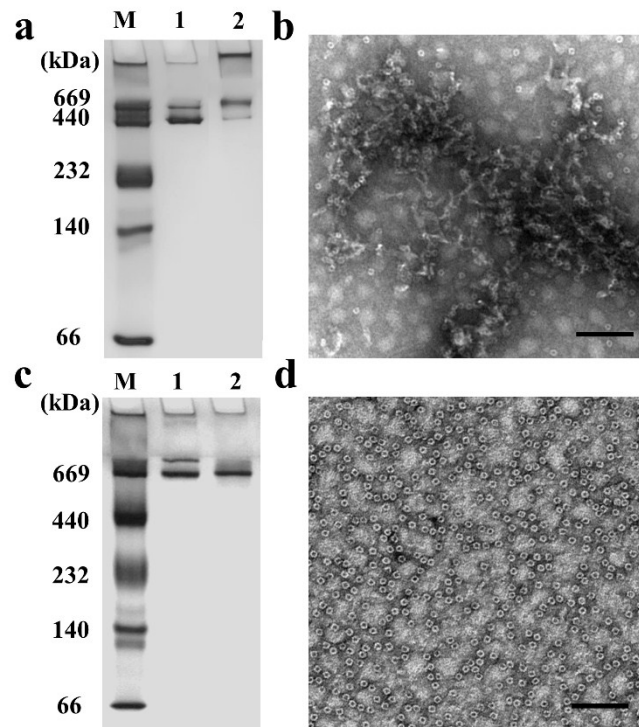

**Figure S9.** (a) Native PAGE analyses of 100 °C treated HuHF for 30 min. Lane M, protein markers and their corresponding molecular masses; lane 1, HuHF; lane 2, 100 °C for 30 min. (b) TEM image of 100 °C treated HuHF for 30 min. (c) native PAGE analyses of 100 °C treated HuHF-∇EP for 30 min. Lane M, protein markers and their corresponding molecular masses; lane 1, HuHF-∇EP; lane 2, 100 °C for 30 min. (d) TEM image of 100 °C treated HuHF-∇EP for 30 min. Scale bars in (b) and (d) represent 100 nm. Conditions: 1.0  $\mu$ M protein in 50 mM MOPS, pH 7.9.

Table S1 Crystallization conditions for each crystal.

|          | Crystallization conditions                                                             | pH  |
|----------|----------------------------------------------------------------------------------------|-----|
| SSFH-2   | 200 mM magnesium acetate tetrahydrate, 100 mM sodium cacodylate trihydrate and 30% MPD | 6.5 |
| TTH-2    | 200 mM MgCl <sub>2</sub> , 3.4 M 1,6-Hexanediol and 100 mM TRIS/HCl                    | 8.5 |
| HuHF-∇EP | 10% PEG 8000, 8% ethylene glycol and 100 mM HEPES/NaOH                                 | 7.5 |

Table S2 Crystallographic properties and data collection and model refinement statistics.

| Parameters                     | SSFH-2                                 | TTH-2                                   | HuHF- $\nabla$ EP                  |
|--------------------------------|----------------------------------------|-----------------------------------------|------------------------------------|
| Wavelength (Å)                 | 0.9791                                 | 0.9789                                  | 0.9789                             |
| Space group                    | I4                                     | I23                                     | P42212                             |
| Resolution range (Å)           | 40.7-2.101<br>(2.177-2.101)            | 40.06-2.598<br>(2.691-2.598)            | 107.3-3.99<br>(4.133-3.99)         |
| Unit cell                      | 130.827,130.827,<br>171.256 90, 90, 90 | 149.902, 149.902, 149.902<br>90, 90, 90 | 219.8, 219.8, 148.34<br>90, 90, 90 |
| Unique reflections             | 83217 (8197)                           | 17400 (1701)                            | 30329 (2887)                       |
| Completeness (%)               | 100                                    | 100                                     | 95                                 |
| Mean I/sigma (I)               | 7.7                                    | 4.5                                     | 4.7                                |
| Wilson B-factor                | 32.59                                  | 42.95                                   | 35.94                              |
| CC1/2                          | 0.992                                  | 0.990                                   | 0.988                              |
| Reflections used in refinement | 83107 (8195)                           | 17380 (1701)                            | 29955 (2877)                       |
| Reflections used for R-free    | 4203 (442)                             | 841 (98)                                | 1515 (160)                         |
| R-work                         | 0.1599 (0.1667)                        | 0.1927 (0.1841)                         | 0.2831 (0.3036)                    |
| R-free                         | 0.1913 (0.2312)                        | 0.2253 (0.2492)                         | 0.3529 (0.4146)                    |
| Number of non-hydrogen atoms   | 8976                                   | 2780                                    | 16972                              |
| macromolecules                 | 8562                                   | 2692                                    | 16956                              |
| ligands                        | 10                                     | 7                                       | 12                                 |
| Protein residues               | 1050                                   | 332                                     | 2064                               |
| RMS (bonds)                    | 0.007                                  | 0.008                                   | 0.003                              |
| RMS (angles)                   | 0.75                                   | 0.94                                    | 0.55                               |
| Ramachandran favored (%)       | 99                                     | 98                                      | 96                                 |
| Ramachandran allowed (%)       | 0.67                                   | 1.5                                     | 3.4                                |
| Ramachandran outliers (%)      | 0                                      | 0.31                                    | 0.64                               |
| Rotamer outliers (%)           | 2.4                                    | 3.1                                     | 3.3                                |
| Clashscore                     | 4.45                                   | 5.64                                    | 7.50                               |
| Average B-factor               | 34.37                                  | 43.82                                   | 43.08                              |
| Macromolecules                 | 34.24                                  | 43.71                                   | 43.10                              |
| Ligands                        | 44.21                                  | 48.40                                   | 47.70                              |
| Solvent                        | 36.91                                  | 47.16                                   | 22.78                              |
